# Supplementary material for: Bioarchaeological Insights into the Process of Domestication of Grapevine (Vitis vinifera L.) during Roman Times in Southern France
Source: PLoS One. 2013 May 15;8(5):e63195. doi: 10.1371/journal.pone.0063195 (PMC3654964; doi:10.1371/journal.pone.0063195)
Supplement: Table S1 — Origin of the wild grapevines included in our reference sample. Bioclimatic contexts mentionned are based on [83]. (XLS) [file pone.0063195.s001.xls]

## Sheet: Feuil1
Individuals	Abb.	Geographic origin		Alt.	Bioclimatic	Nb of
		Country	Area		context	pips
Individuals sampled in their natural habitat
Belaygue	Bela	France	FR	250	Collinean	10
Casarza Ligure, Ind. 1	Cas1	Italy	IT	60	Mesomedit.	30
Casarza Ligure, Ind. 2	Cas2					30
Centenillo, Ind. 2	Cent2	Spain	IB	580	Thermomedit.	30
Centenillo, Ind. 5	Cent5					30
Centenillo, Ind. 9	Cent9					30
Eleftherochori, Ind. 1	Elef1	Greece	BA	500	Mesomedit.	30
Eleftherochori, Ind. 2	Elef2					30
Eleftherochori, Ind. 11	Elef11					30
Grésigne, Ind. E	GRSE	France	FR	340	Collinean	30
Grésigne, Ind. F	GRSF					30
Ketsch, Ind. 3	KTS3	Germany	CE	100	Collinean	30
Ketsch, Ind. 8	KTS8					30
Lavall, Ind. 1	Lava1	France	FR	300	Mesomedit.	13
Lavall, Ind. 3	Lava3					30
Lago di Martignano, Ind. 1	Mart1	Italy	IT	376	Mesomedit.	30
Lago di Martignano, Ind. 4	Mart4					30
Lago di Martignano, Ind. 5	Mart5					30
Lescale, Ind. 16	Lesc16	France	FR	610	Collinean	30
Olave, Ind. 2	Olav2	Spain	IB	383	Collinean	30
Olave, Ind. 3	Olav3					15
Pic Saint Loup, Ind. 12	PSL12	France	FR	280	Mesomedit.	30
Pic Saint Loup, Ind. 13	PSL13					30
Salvan, Ind. 1	Salv1	Switzerland	CE	580	Collinean	30
Salvan, Ind. 2	Salv2					30
Ste Croix en Plaine*	StCx	France	FR	150	Collinean	30
Saranthaporos, Ind. 2	Sara2	Greece	BA	541	Mesomedit.	30
Valbonne, Ind. 1	Valb1	France	FR	250	Mesomedit.	30
Valbonne, Ind. 17	Valb17					30
Individuals sampled from collections
Sylvestris 53*	Sy53	Switzerland	CE	190	Collinean	30
Cadiz 16	Cdz16	Spain	IB	30	Thermomedit.	30
Malaga 9	Mal9	Spain	IB	30	Thermomedit.	30
Grésigne 1	GRS1V	France	FR	1	Collinean	30
Grésigne 9	GRS9V	France	FR	1	Collinean	30
Ketsch 1	KTS1V	Germany	CE	1	Collinean	30
Ketsch 2	KTS2V	Germany	CE	1	Collinean	30
